# Supplementary material for: Synthesis and antimalarial activity of new 4-aminoquinolines active against drug resistant strains
Source: Royal Society of Chemistry journal article supplement (doi:10.1039/c6ra14016e), 2016-01-01
Supplement: c6ra14016e1.pdf [file c6ra14016e1.pdf]

## Supporting information

### **Synthesis and Antimalarial Activity of New 4-Aminoquinolines Active Against Drug Resistant Strains**

Srinivasarao Kondaparla<sup>a</sup>, Awakash Soni<sup>b</sup>, Ashan Manhas<sup>b</sup>, Kumkum Srivastava<sup>b</sup>, Sunil K. Puri<sup>b</sup>, and S. B. Katti<sup>a\*</sup>

<sup>a</sup>*Medicinal & Process Chemistry Division, CSIR-Central Drug Research Institute Sector-10, Jankipuram Extension, Sitapur Road, Lucknow -226031.*

<sup>b</sup>*Parasitology Division, CSIR-Central Drug Research Institute, Sector-10, Jankipuram Extension, Sitapur Road, Lucknow-226031.*

|                                                                                    |         |
|------------------------------------------------------------------------------------|---------|
| Compound <b>10g</b> ( <sup>1</sup> H & <sup>13</sup> C NMR)                        | S2      |
| Compounds <b>10h, 10i, 10k, 10l</b> ( <sup>1</sup> H, <sup>13</sup> C & HRMS)      | S3-S8   |
| Compounds <b>11f, 11g, 11j, 11k, 11l</b> ( <sup>1</sup> H, <sup>13</sup> C & HRMS) | S9-S16  |
| Compounds <b>12f</b> and <b>12i</b> ( <sup>1</sup> H, <sup>13</sup> C & HRMS)      | S16-S19 |

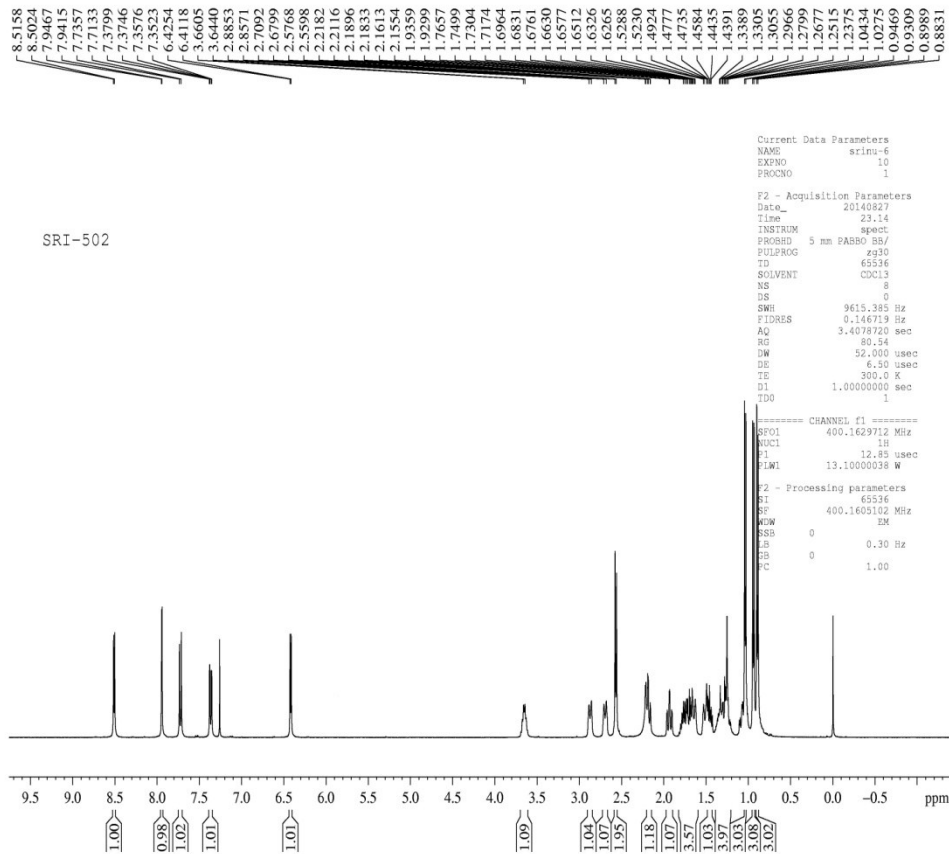

<sup>1</sup>H NMR of compound **10g** at 400 MHz (CDCl<sub>3</sub>)

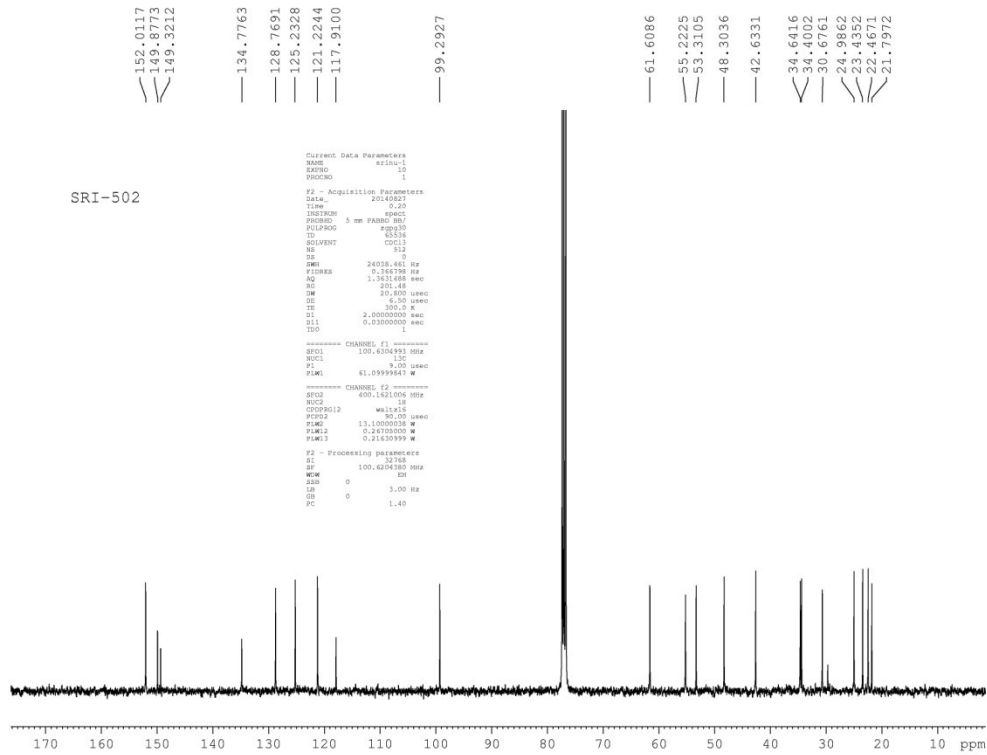

MR of compound **10g** at 100 MHz (CDCl<sub>3</sub>)

<sup>13</sup>C N

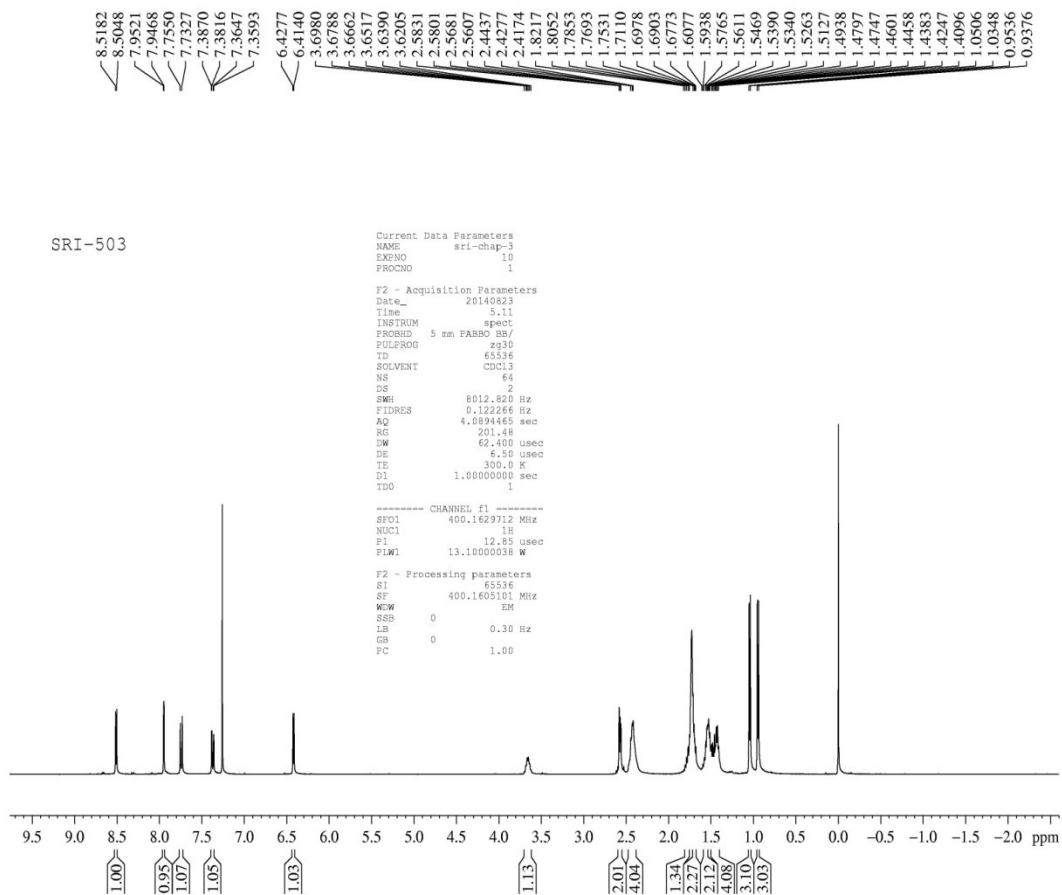

<sup>1</sup>H NMR of compound **10h** at 400 MHz (CDCl<sub>3</sub>)

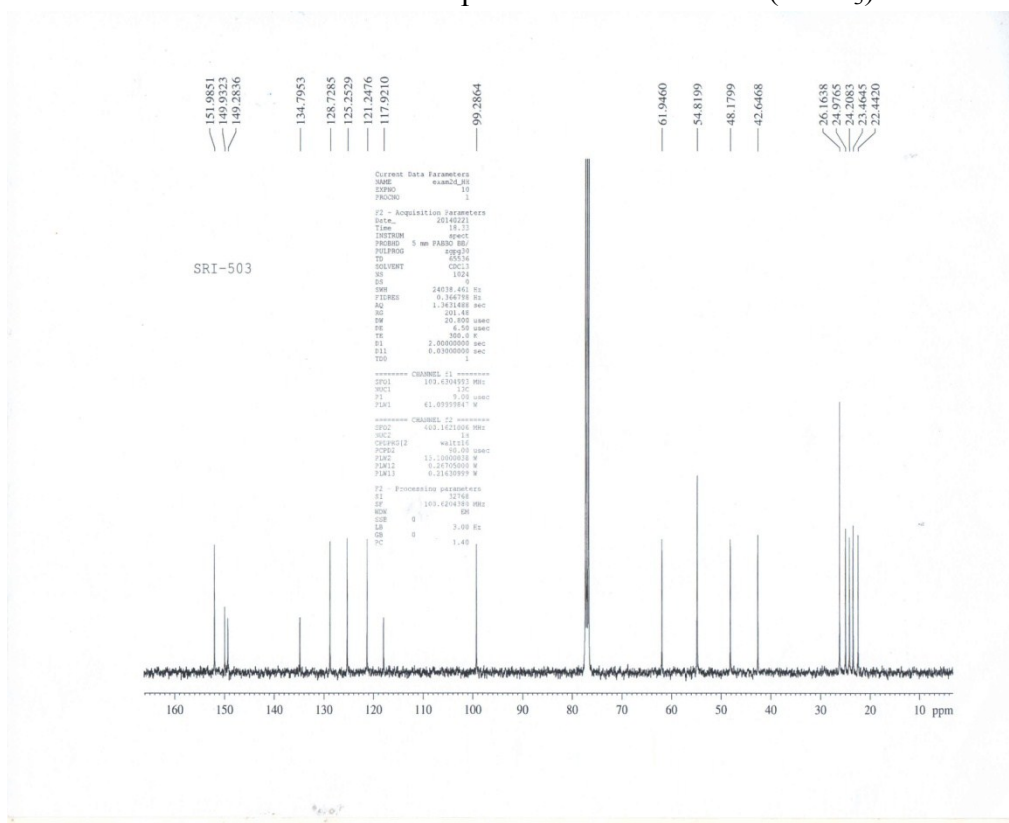

<sup>13</sup>C NMR of compound **10h** at 100 MHz (CDCl<sub>3</sub>)

|               |                   |             |           |                 |              |                        |                      |
|---------------|-------------------|-------------|-----------|-----------------|--------------|------------------------|----------------------|
| Sample Name   | Dr. KATTY         | Position    | Vial 20   | Instrument Name | Instrument 1 | User Name              |                      |
| Inj Vol       | 1                 | InjPosition |           | SampleType      | Sample       | IRM Calibration Status | Success              |
| Data Filename | SBK-SRI-503-169.d | ACQ Method  | ISO-JAN.m | Comment         |              | Acquired Time          | 2/24/2014 2:08:39 PM |

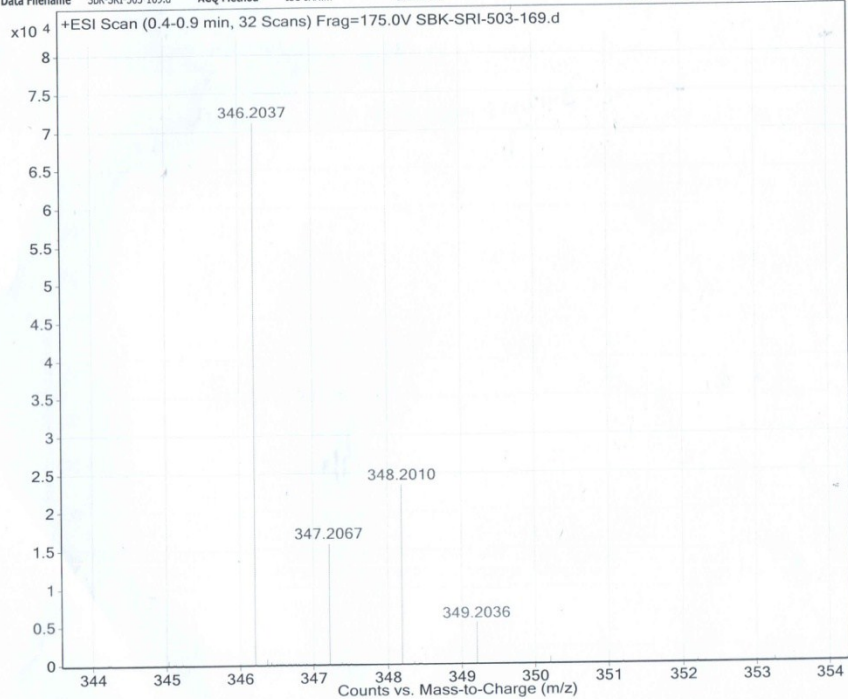

### HRMS of Compound 10h

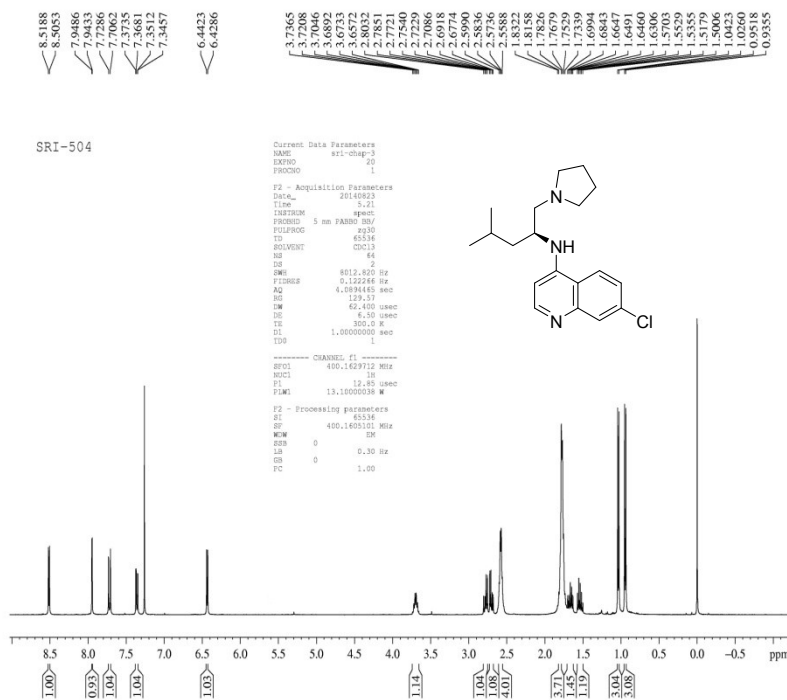

<sup>1</sup>H NMR of compound 10i at 400 MHz (CDCl<sub>3</sub>)

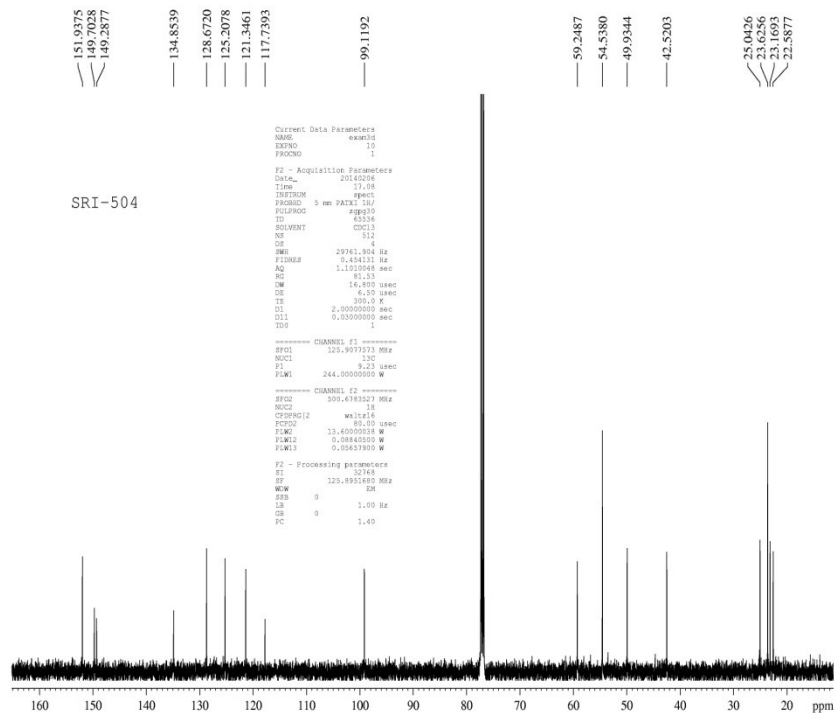

$^{13}\text{C}$  NMR of compound **10i** at 125 MHz ( $\text{CDCl}_3$ )

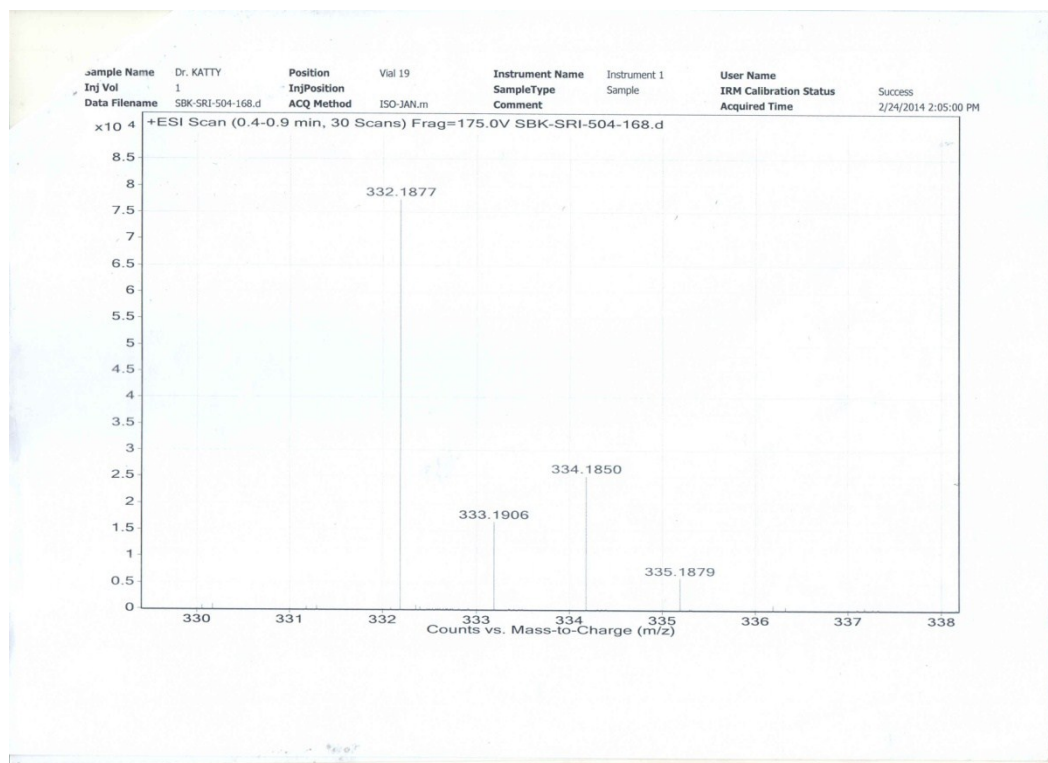

HRMS of Compound **10i**

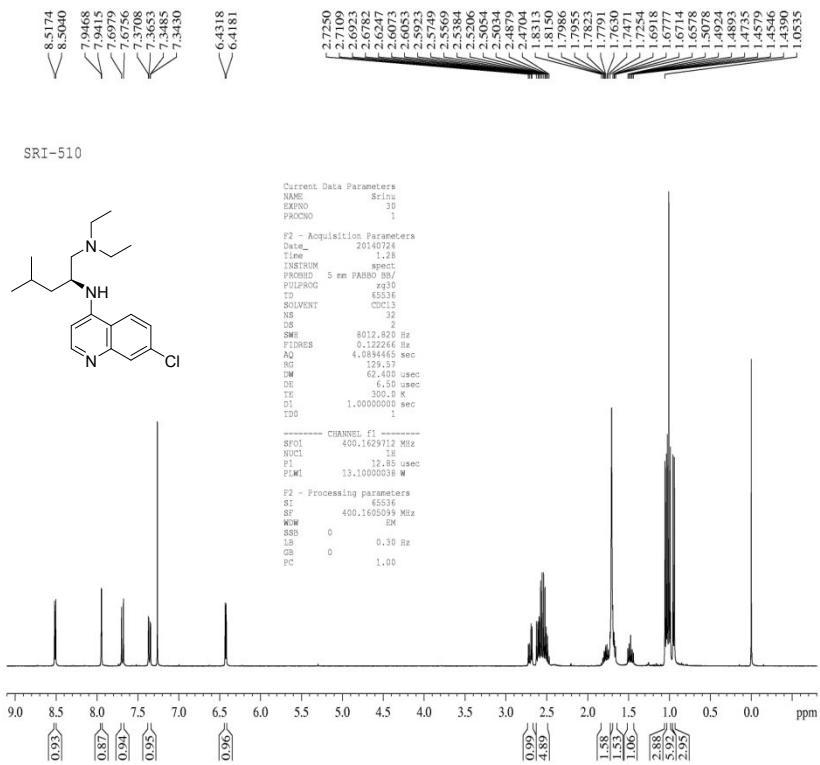

<sup>1</sup>H NMR of compound 10k at 400 MHz (CDCl<sub>3</sub>)

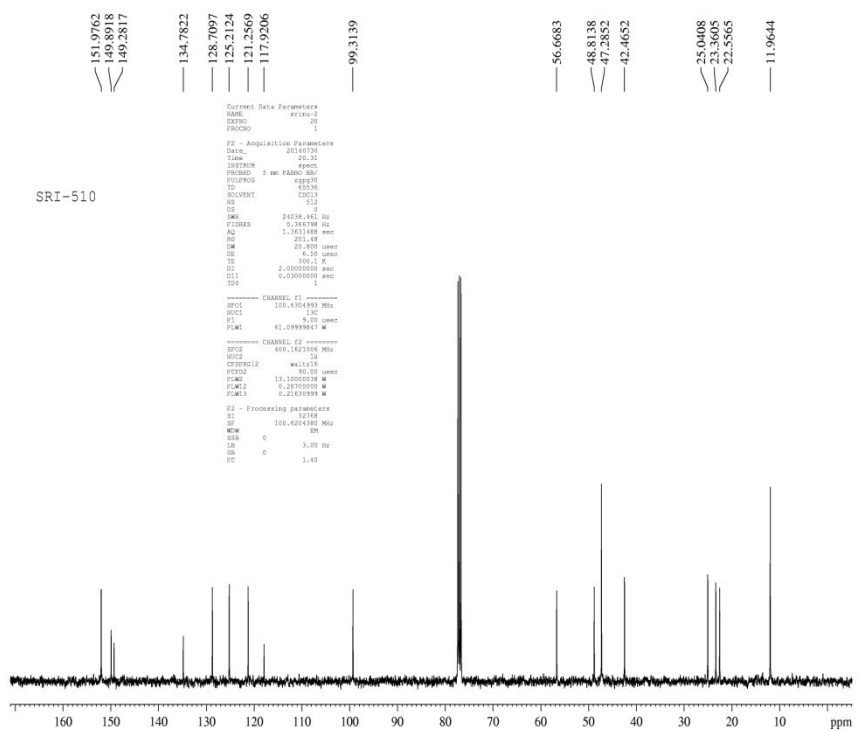

<sup>13</sup>C NMR of compound 10k at 100 MHz (CDCl<sub>3</sub>)

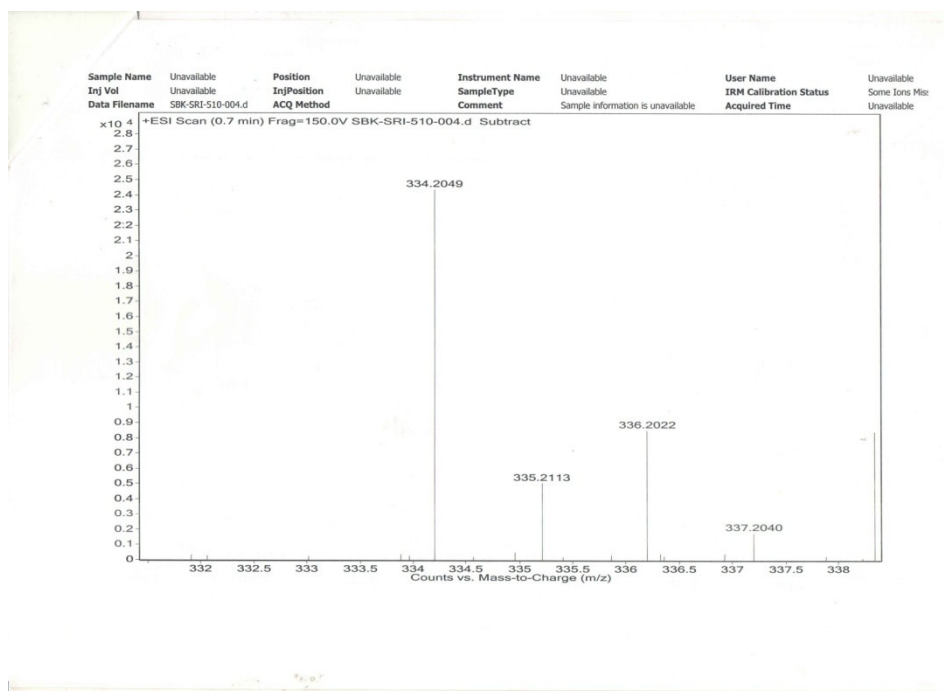

HRMS of Compound 10k

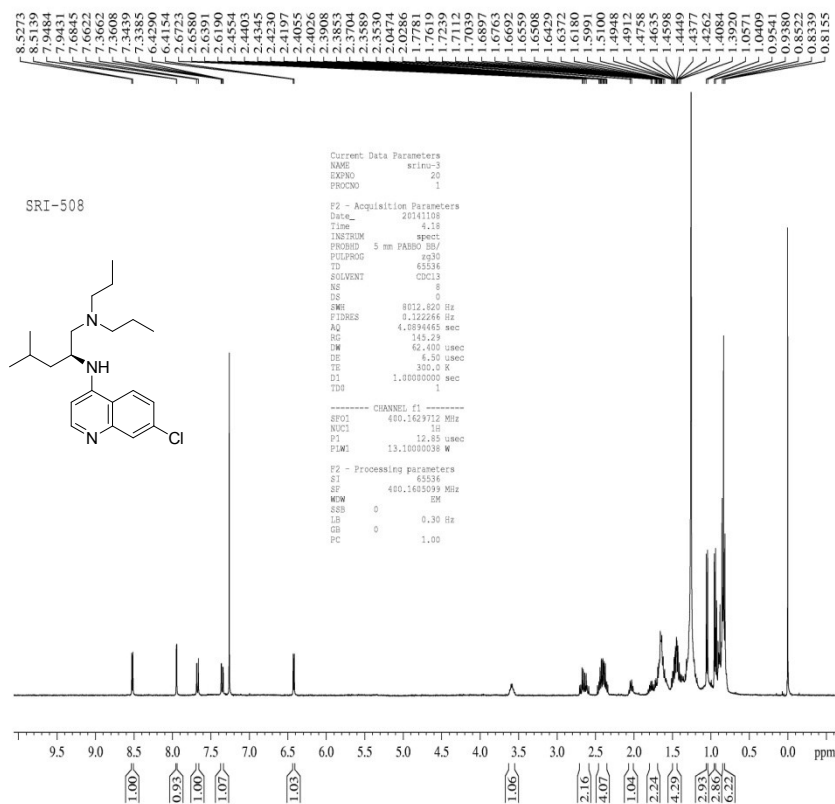

<sup>1</sup>H NMR of compound 10l at 400 MHz (CDCl<sub>3</sub>)

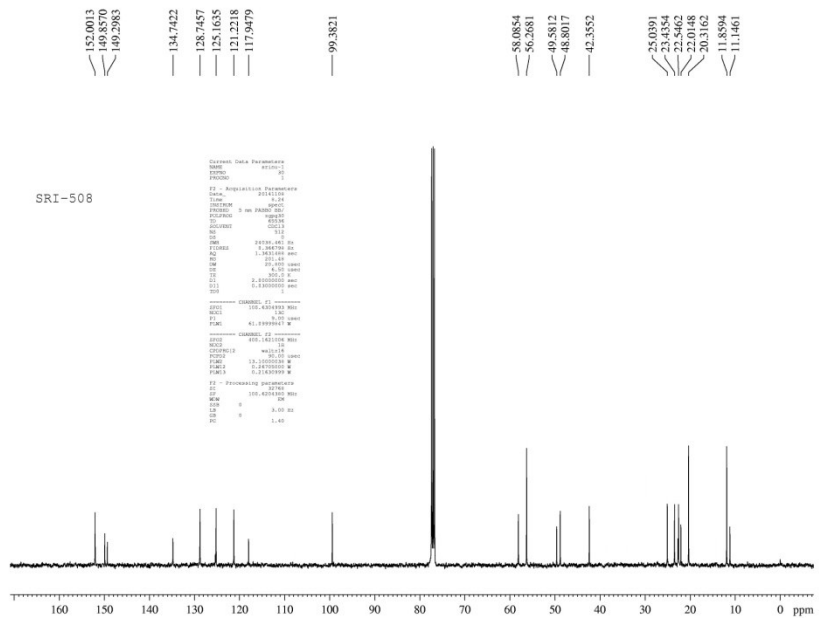

<sup>13</sup>C NMR of compound **101** at 100 MHz (CDCl<sub>3</sub>)

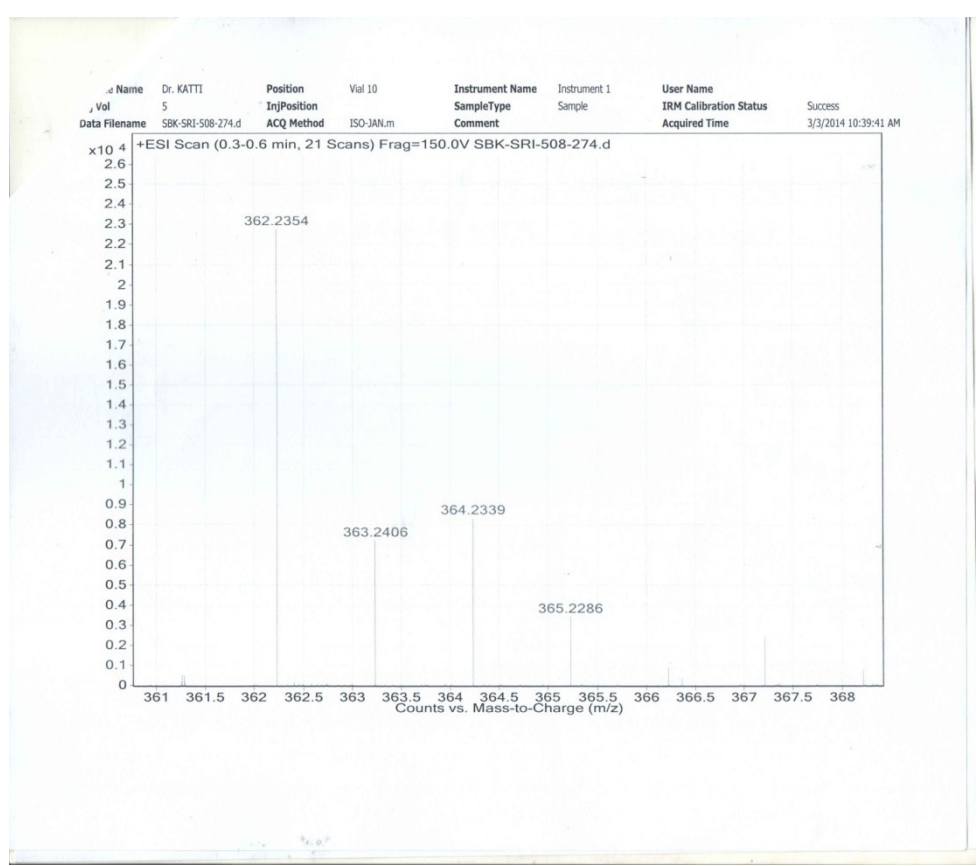

HRMS of Compound **101**



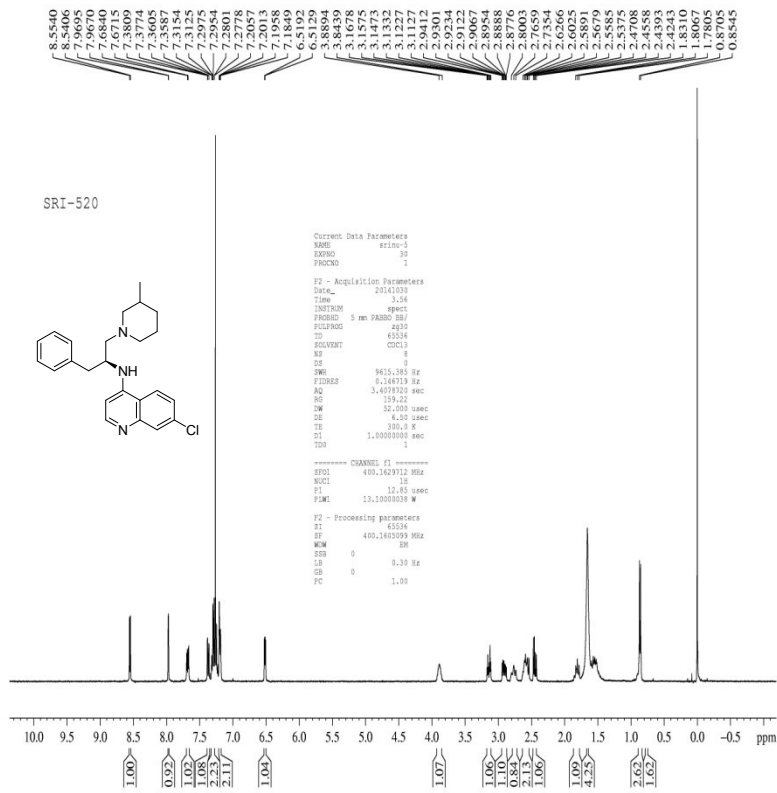

<sup>1</sup>H NMR of compound **11f** at 400 MHz (CDCl<sub>3</sub>)

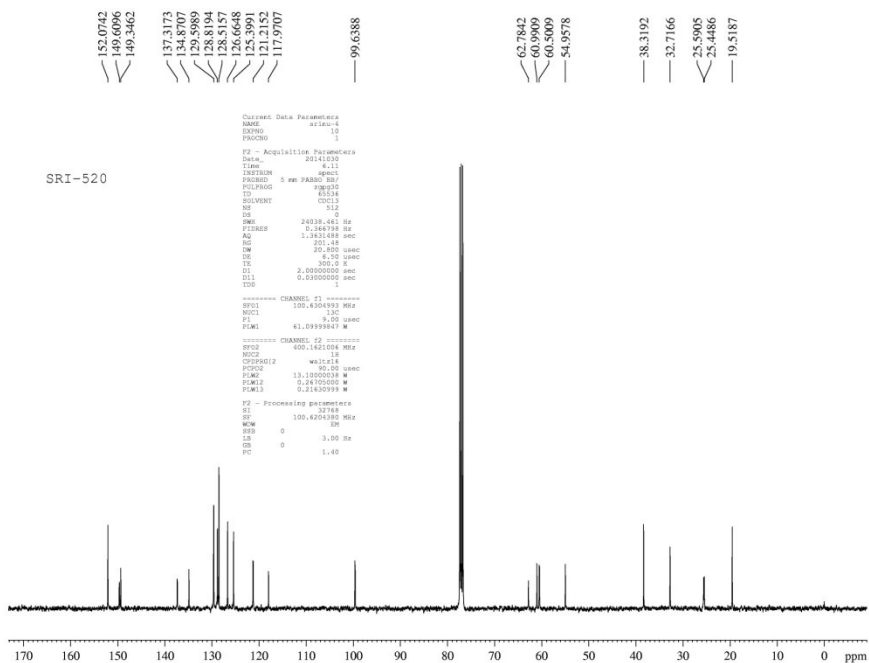

<sup>13</sup>C NMR of compound **11f** at 100 MHz (CDCl<sub>3</sub>)

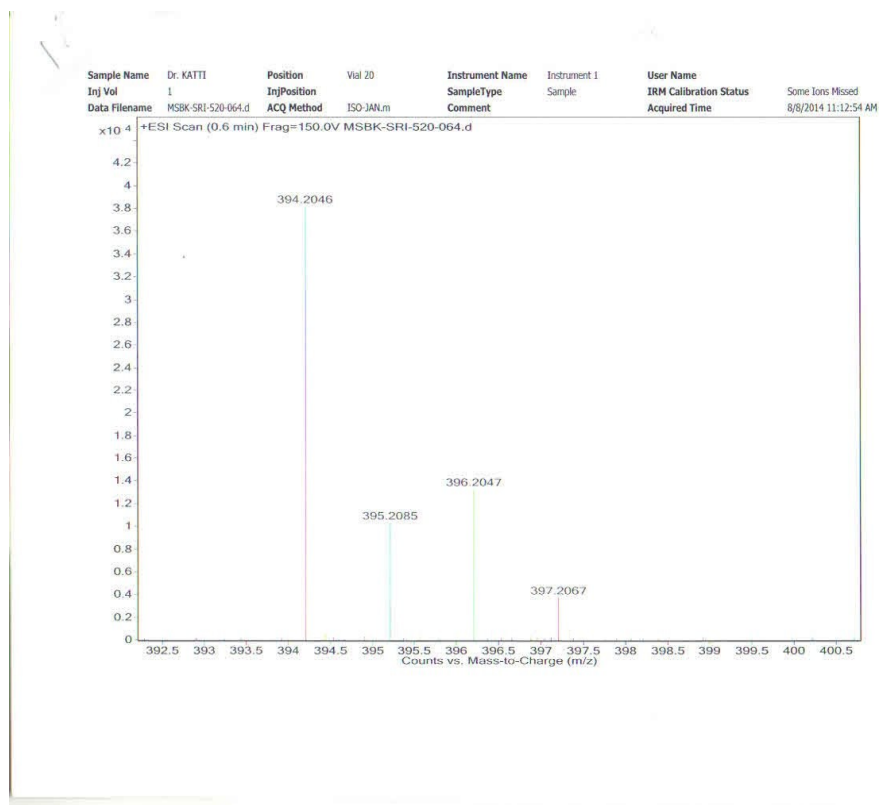

HRMS of Compound 11f

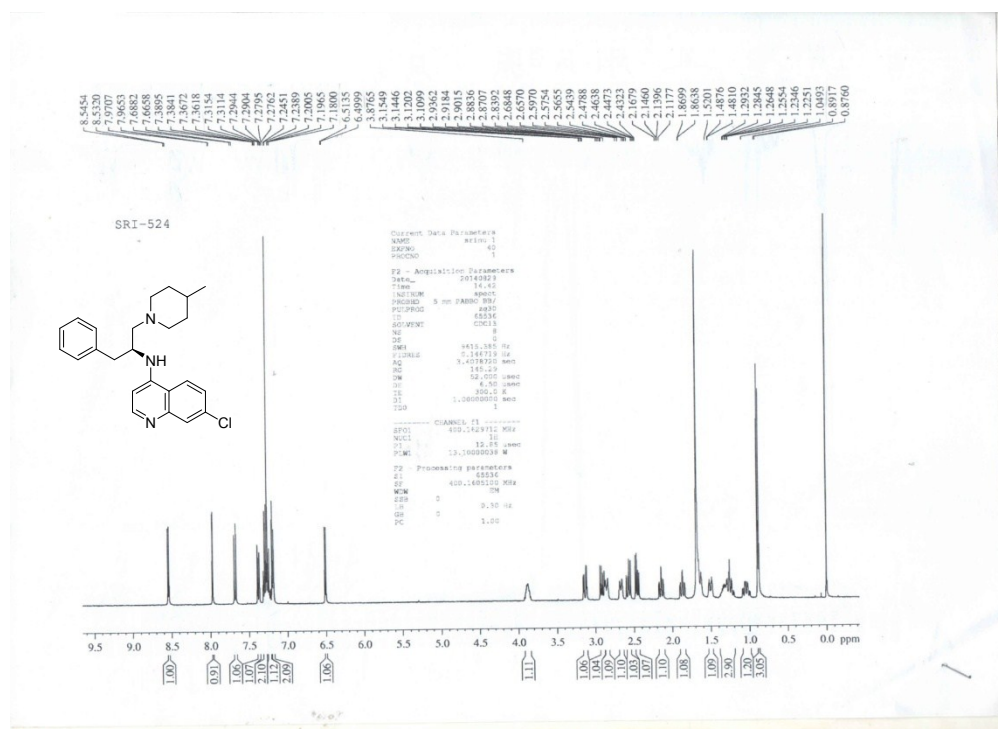

<sup>1</sup>H NMR of compound 11g at 400 MHz (CDCl<sub>3</sub>)

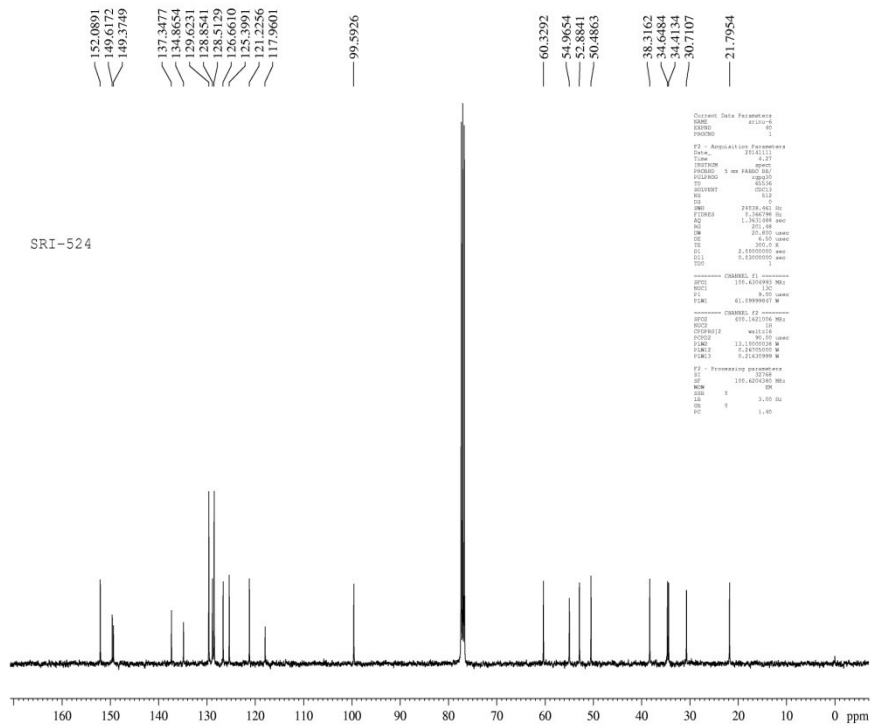

$^{13}\text{C}$  NMR of compound **11g** at 100 MHz ( $\text{CDCl}_3$ )

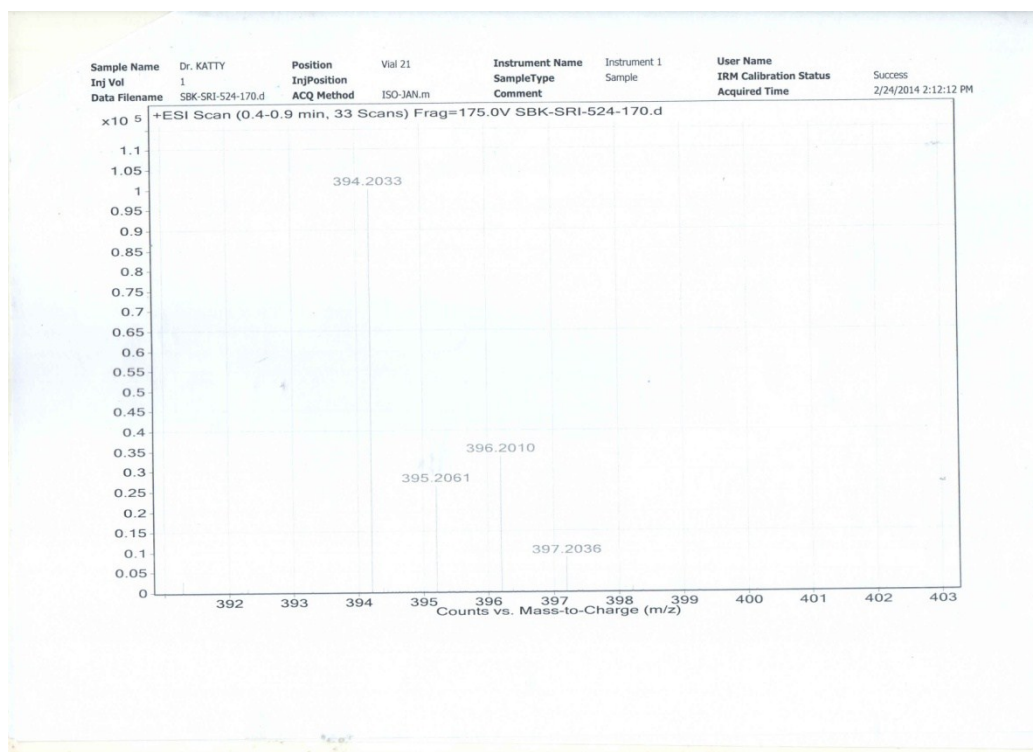

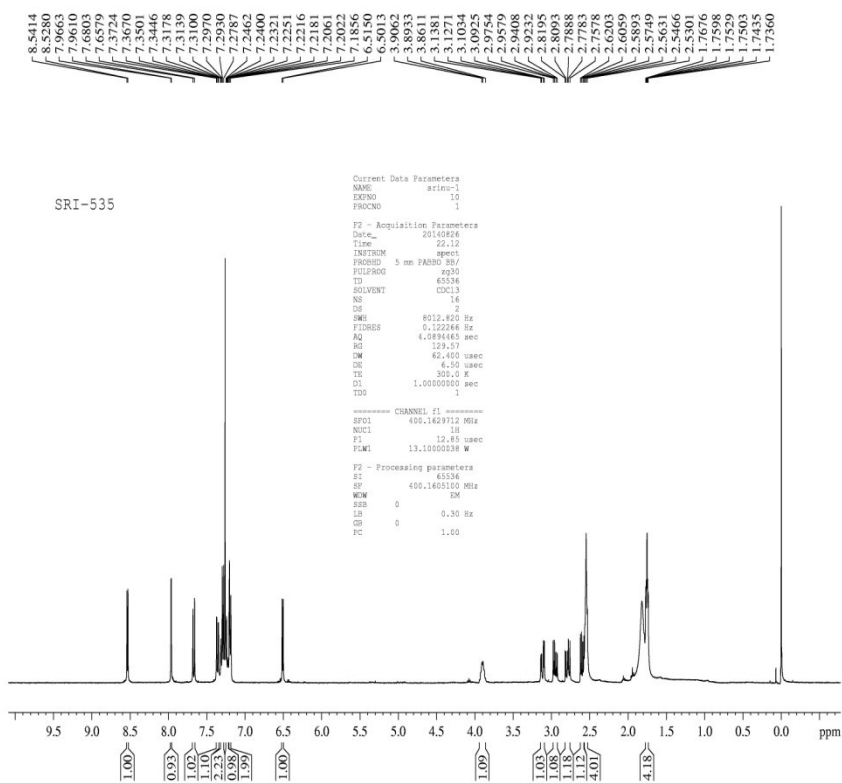

HRMS of Compound 11g

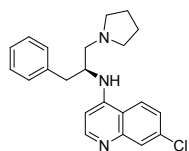

<sup>1</sup>H NMR of compound **11j** at 400 MHz (CDCl<sub>3</sub>)

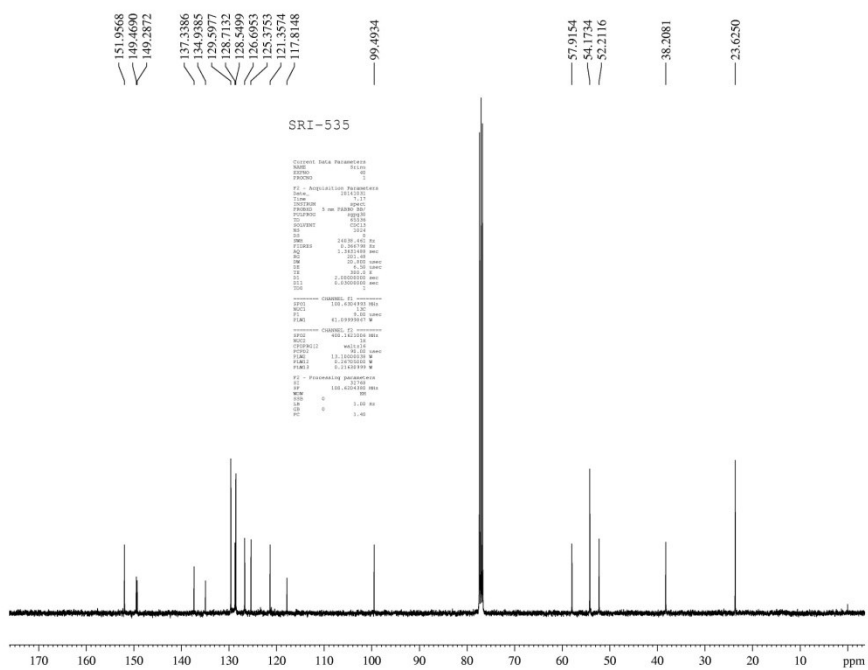

<sup>13</sup>C NMR of compound **11j** at 100 MHz (CDCl<sub>3</sub>)

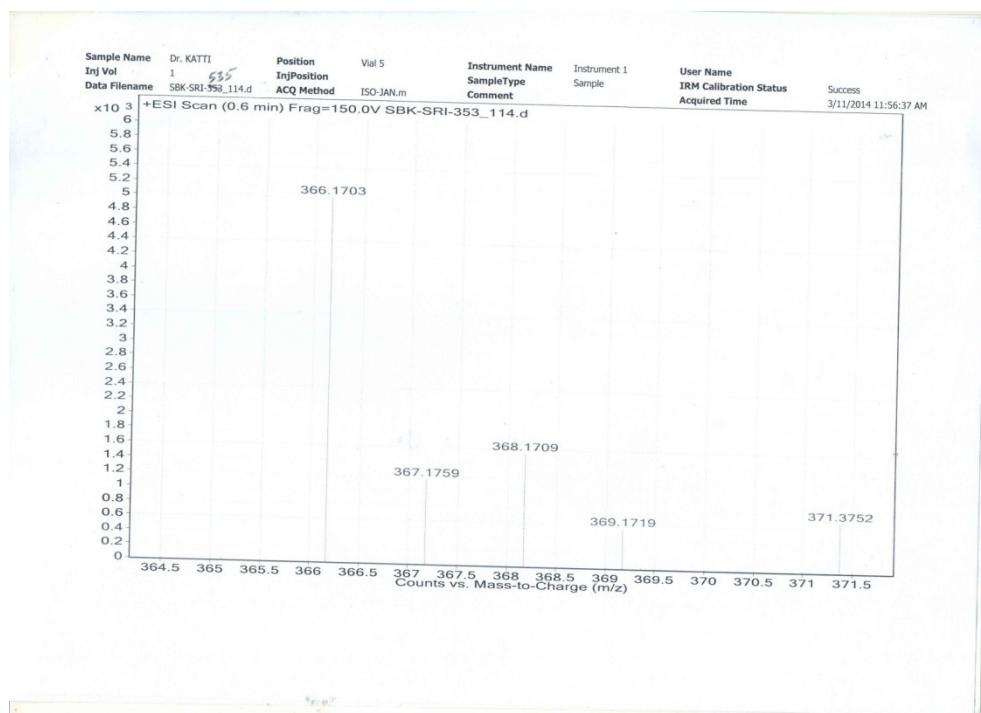

### HRMS of Compound 11j

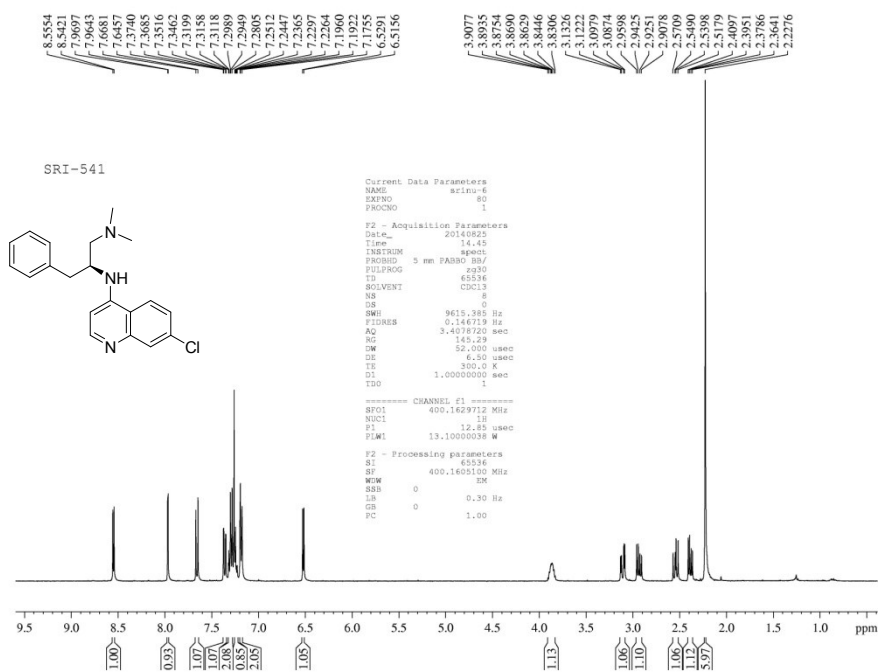

<sup>1</sup>H NMR of compound 11k at 400 MHz (CDCl<sub>3</sub>)

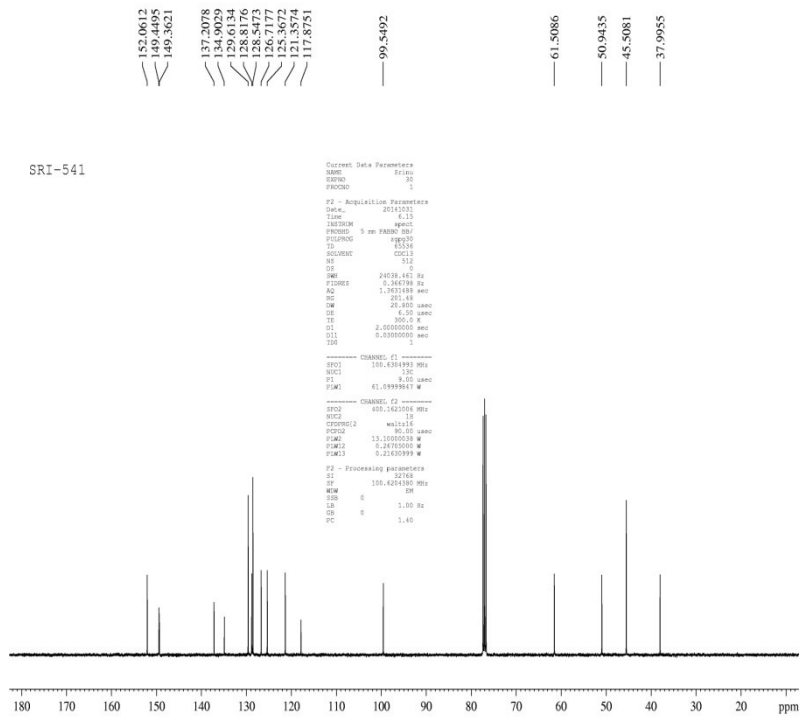

<sup>13</sup>C NMR of compound **11k** at 100 MHz (CDCl<sub>3</sub>)

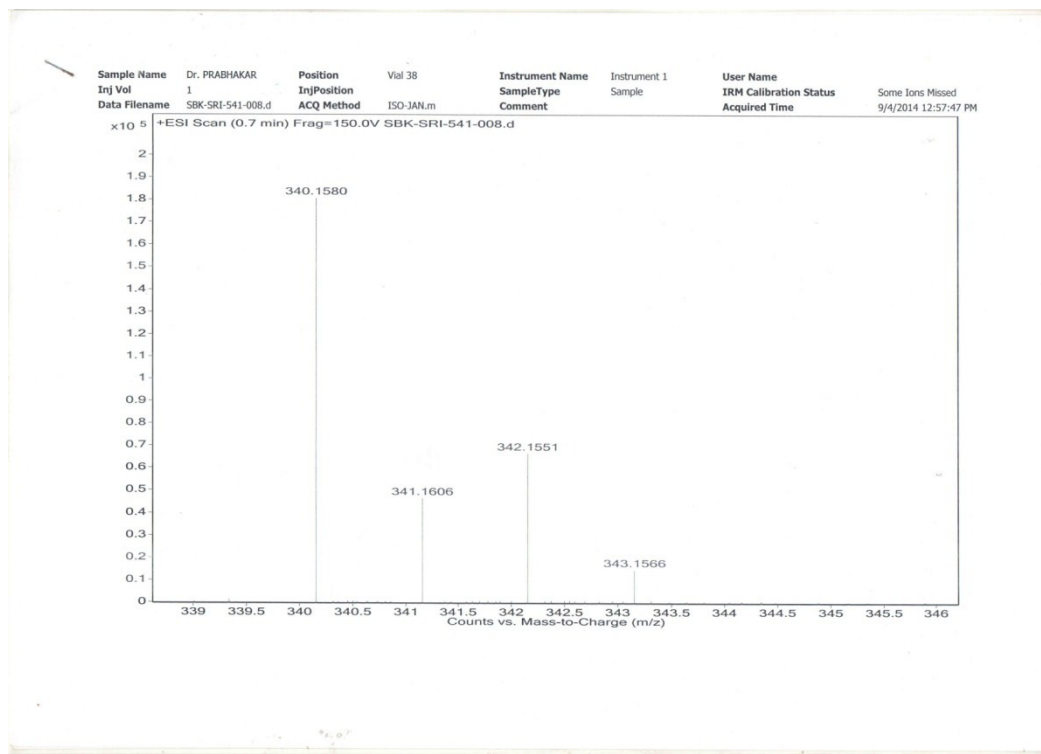

## HRMS of Compound 11k

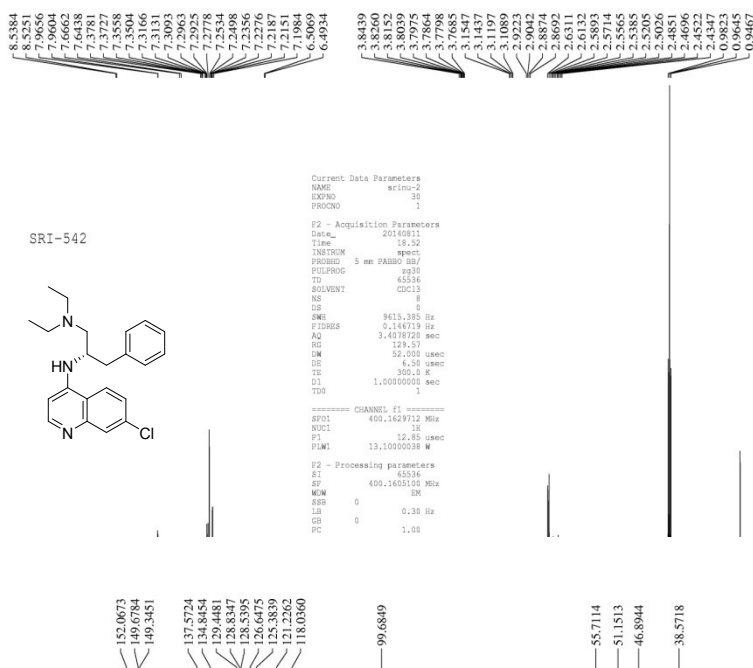

## <sup>1</sup>H NMR of compound 11l at 400 MHz (CDCl<sub>3</sub>)

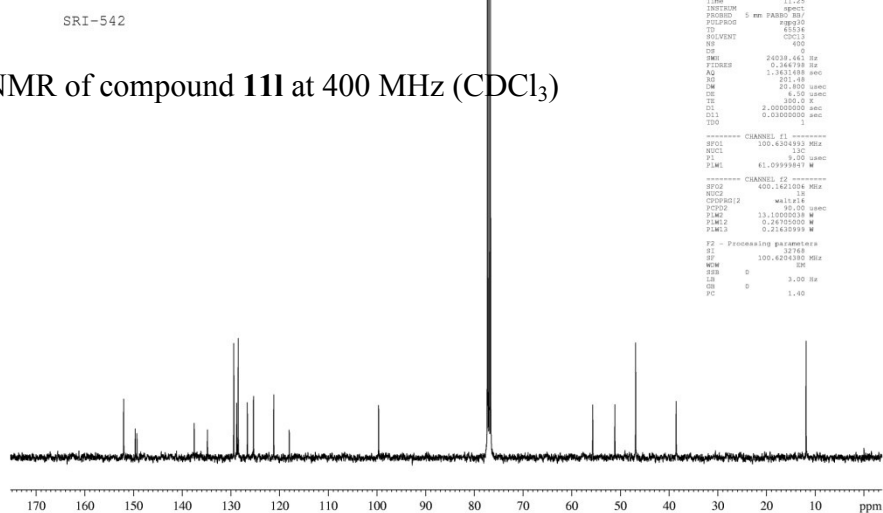



$^{13}\text{C}$  NMR of compound **111** at 100 MHz ( $\text{CDCl}_3$ )

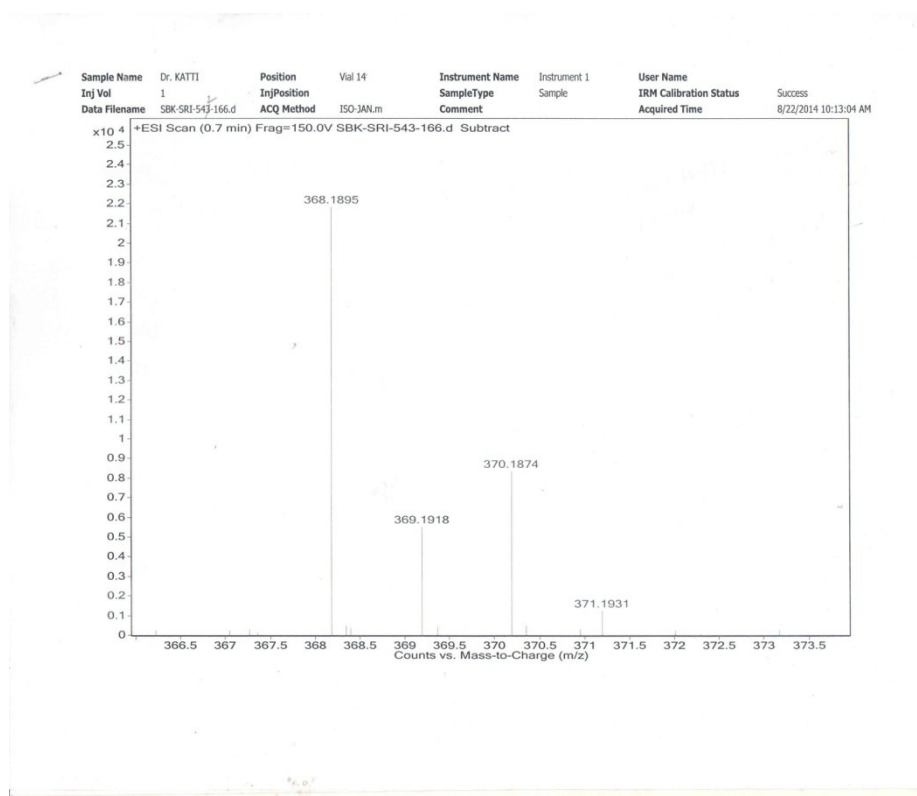

HRMS of Compound **111**

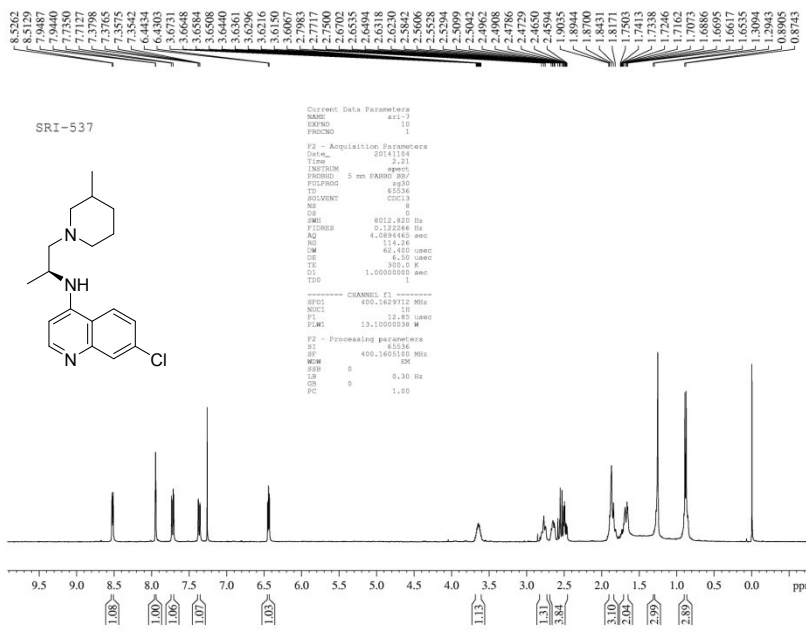

<sup>1</sup>H NMR of compound **12f** at 400 MHz (CDCl<sub>3</sub>)

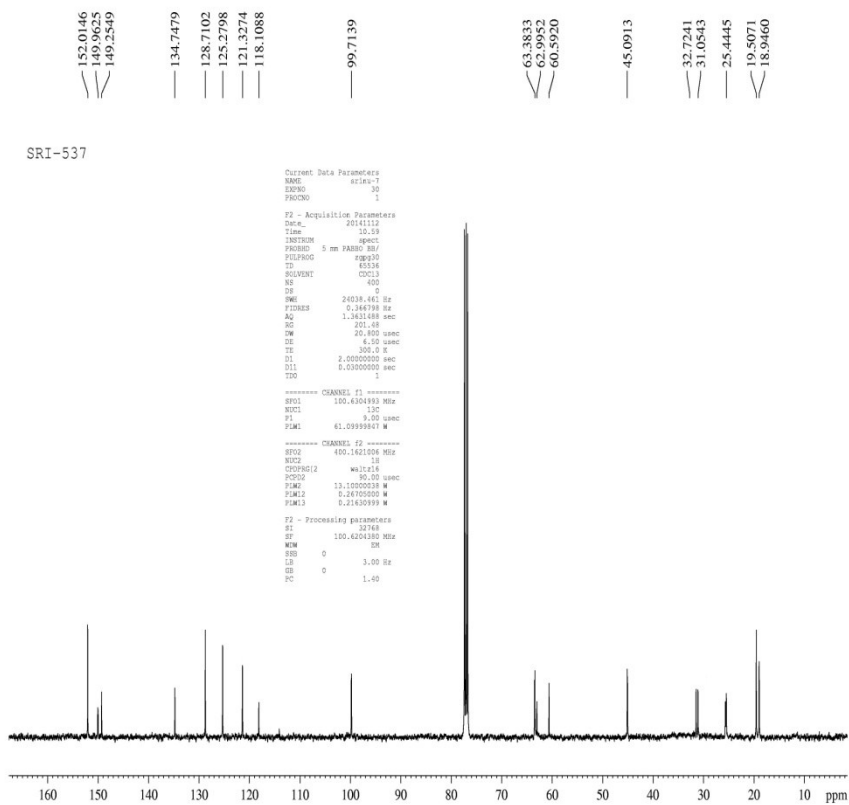

$^{13}\text{C}$  NMR of compound **12f** at 100 MHz ( $\text{CDCl}_3$ )

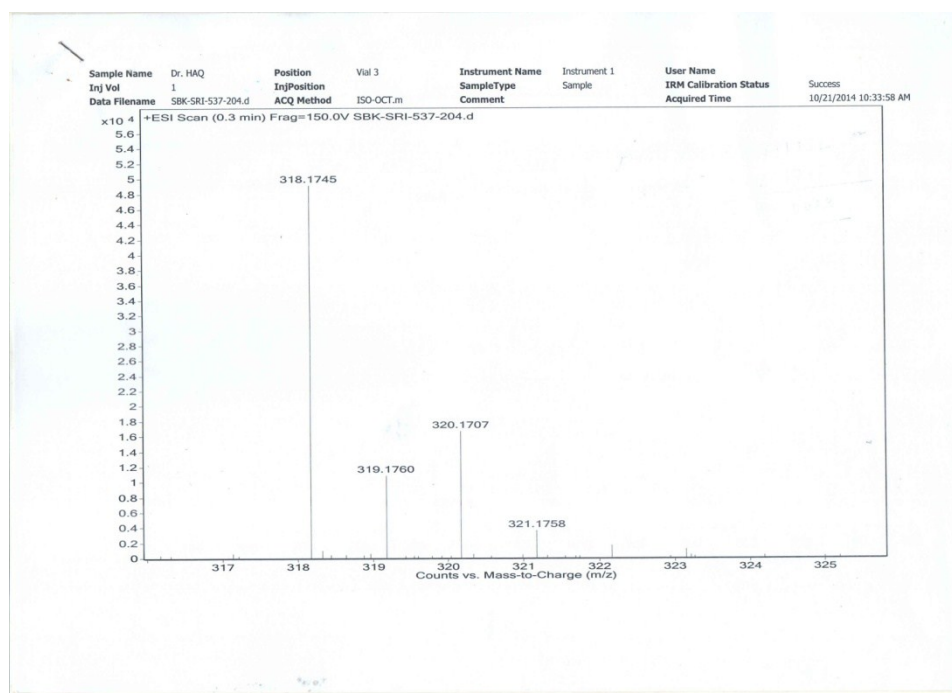

HRMS of Compound **12f**

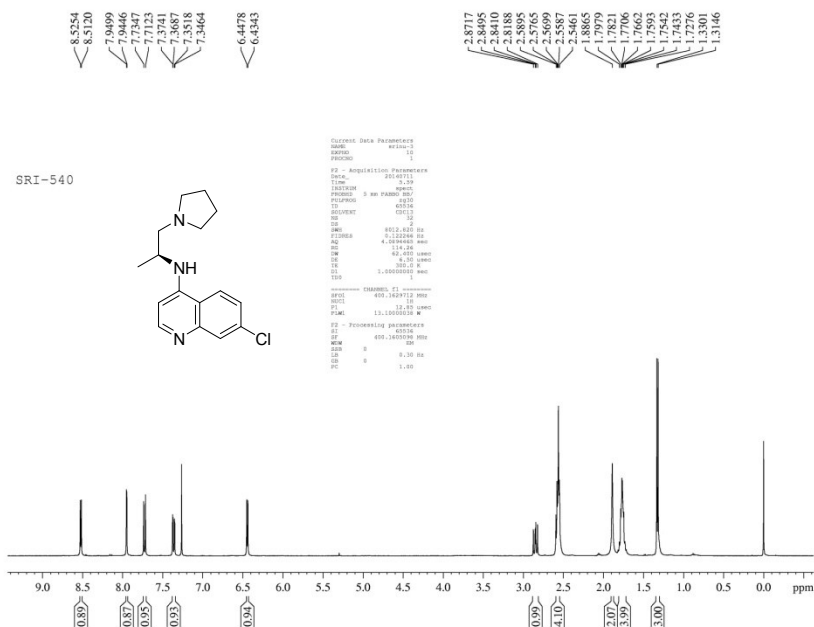

$^1\text{H}$  NMR of compound **12i** at 400 MHz ( $\text{CDCl}_3$ )

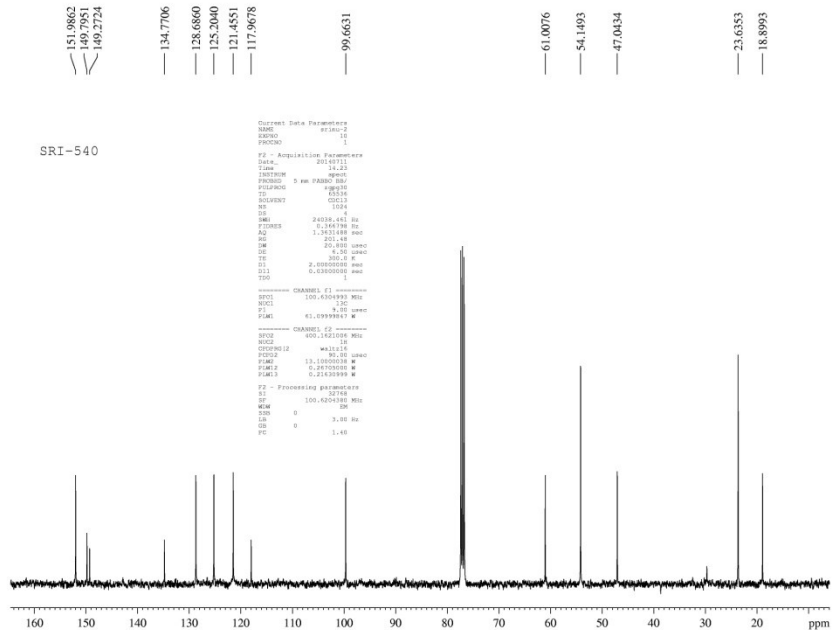

<sup>13</sup>C NMR of compound **12i** at 100 MHz (CDCl<sub>3</sub>)

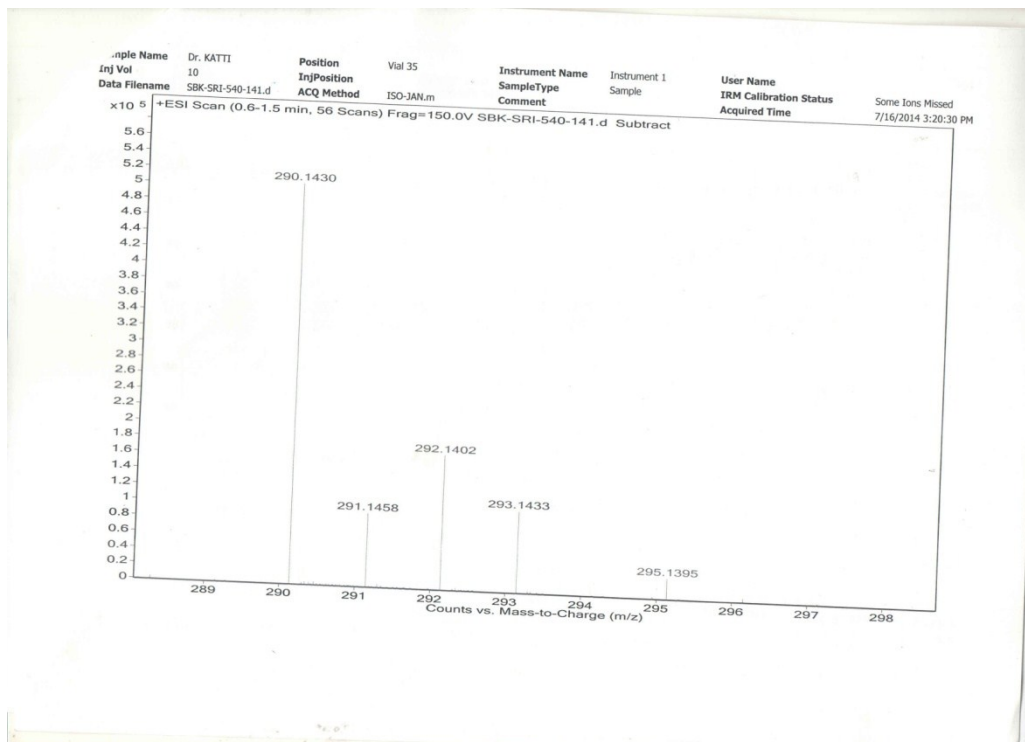

HRMS of Compound **12i**
